# Supplementary material
Source: ML conference proceedings conference paper supplement (https://openreview.net/forum?id=AVWZuwrl8l)
Supplement: supplementary_material [file attachment]

# DreamVTON: Customizing 3D Virtual Try-on with Personalized Diffusion Models – Supplementary Materials –

Anonymous Authors

## 1 INTRODUCTION

In supplementary materials, we first provide additional experiment details in Section 2, including the details of the user study and visual examples of templates used for training. We then provide more visual results in Section 3, including more qualitative comparisons with the existing 3D human generation methods and additional videos of generated 3D results. Finally, we present the details of DreamVTON’s architecture in Section 4.

## 2 ADDITIONAL EXPERIMENT DETAILS

### 2.1 Details of User Study

For user study, we design three questionnaires to separately evaluate the **Accuracy** (as shown in Figure 2 (a)), **Realism** (as shown in Figure 2 (b)), and **Geometry Smoothness** (as shown in Figure 2 (c)) of the 3D try-on results generated by various methods. To be specific, **Accuracy** is used to measure whether the try-on results can preserve a particular person’s identity and clothes characteristics, while **Realism** and **Geometry Smoothness** are used to evaluate the quality of generated texture and geometry, respectively.

Each questionnaire is composed of 9 assignments, and the amounts of volunteers for these three questionnaires (i.e., (a), (b), (c) in Figure 2) are 31, 26, and 21, respectively. For each assignment in the questionnaire, given the person and clothes images, volunteers are asked to select the best 3D try-on result (presented in video format) out of four options, which are generated by our DreamVTON and the other baseline methods (i.e., DreamWaltz [2], TEXTure [4], TeCH [3]). Besides, the order of the generated results in each assignment is randomly shuffled. Figure 2 shows the interface for each questionnaire. For analysis of the user study results, please refer to Section 4.4 in the main text.

### 2.2 Visual Examples of Training Templates

As mentioned in Section 3.2 in the main text, our DreamVTON employs various generated template images for geometry and texture optimization. For geometry optimization, DreamVTON uses eight mask templates  $\{\hat{\mathbf{m}}_i\}_{i=1}^8$  (i.e., uniformly distributed views around the human body) to constrain the geometry shape learning, and uses two normal templates  $\{\hat{\mathbf{n}}_i\}_{i=1}^2$  (i.e., front view and back view) to enhance the geometry detail learning. Figure 1 (a) and (b) display examples of mask and normal templates for one try-on use case. For texture optimization, DreamVTON uses three RGB templates  $\{\hat{\mathbf{x}}_i\}_{i=1}^3$  (i.e., front and back full body view, and front face view) to enhance the texture detail learning. Figure 1 (c) displays examples of RGB templates for one try-on use case.

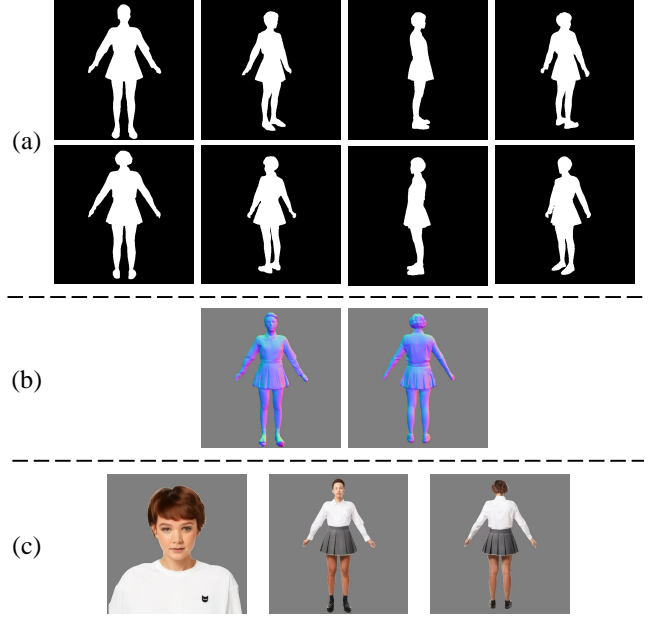

**Figure 1: (a) Examples of mask templates. (b) Examples of normal templates. (c) Examples of RGB templates.**

## 3 ADDITIONAL EXPERIMENT RESULTS

We provide additional visual comparisons among our proposed DreamVTON and the existing 3D human generation methods (i.e., DreamWaltz [2], TEXTure [4], and TeCH [3]) in Figure 3 and Figure 4. Furthermore, we also provide the rotated views of DreamVTON’s 3D try-on results in the accompanying video (named **DreamVTON-video.mp4**). Please refer to video for more details.

## 4 ARCHITECTURE DETAILS OF DREAMVTON

For the network architecture, our DreamVTON follows Fantasia3D [1], the geometry network  $\Psi_g$  is implemented as a three-layer MLP, while the texture network  $\Psi_t$  is implemented as a two-layer MLP. We illustrate the network architecture in Table 1.

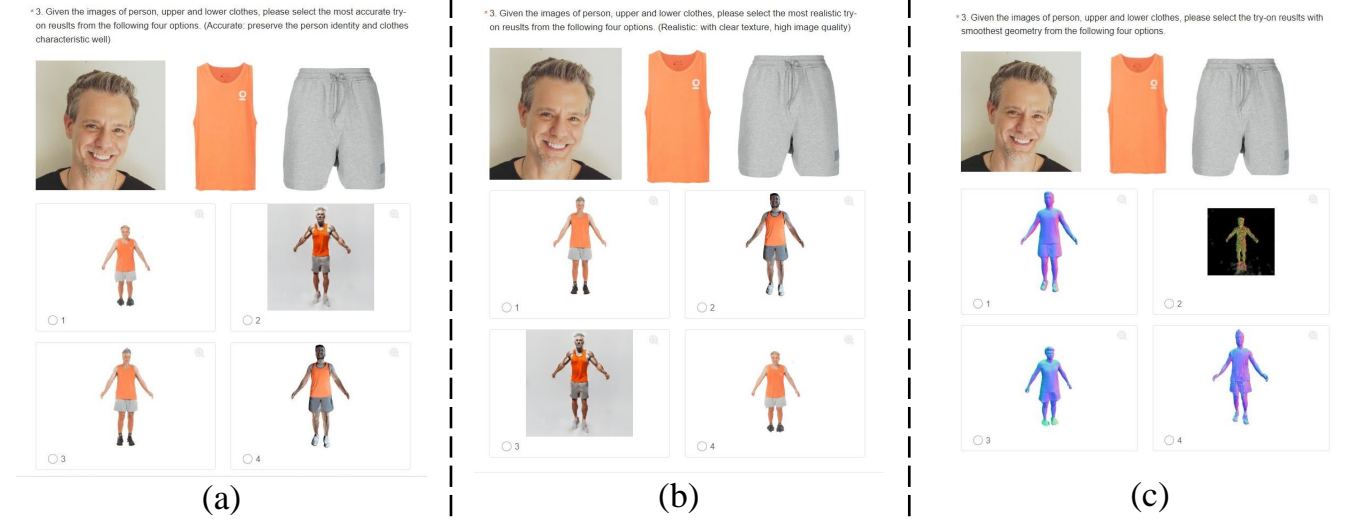

**Figure 2: Interface of the questionnaires used to evaluate Accuracy, Realism, and Geometry Smoothness of the generated 3D try-on results.**

| Network                   | Architecture                                                                                                                                                                                                                       |
|---------------------------|------------------------------------------------------------------------------------------------------------------------------------------------------------------------------------------------------------------------------------|
| Geometry Network $\Psi_g$ | (Encoder):<br>Linear(in_feat=3, out_feat=32, bias=False)<br>(MLP):<br>Linear(in_feat=32, out_feat=32, bias=False)<br>ReLU()<br>Linear(in_feat=32, out_feat=32, bias=False)<br>ReLU()<br>Linear(in_feat=32, out_feat=4, bias=False) |
| Texture Network $\Psi_t$  | (Encoder):<br>Linear(in_feat=3, out_feat=32, bias=False)<br>(MLP):<br>Linear(in_feat=32, out_feat=32, bias=False)<br>ReLU()<br>Linear(in_feat=32, out_feat=9, bias=False)                                                          |

**Table 1: Architecture of Geometry Network  $\Psi_g$  and Texture Network  $\Psi_t$ .**

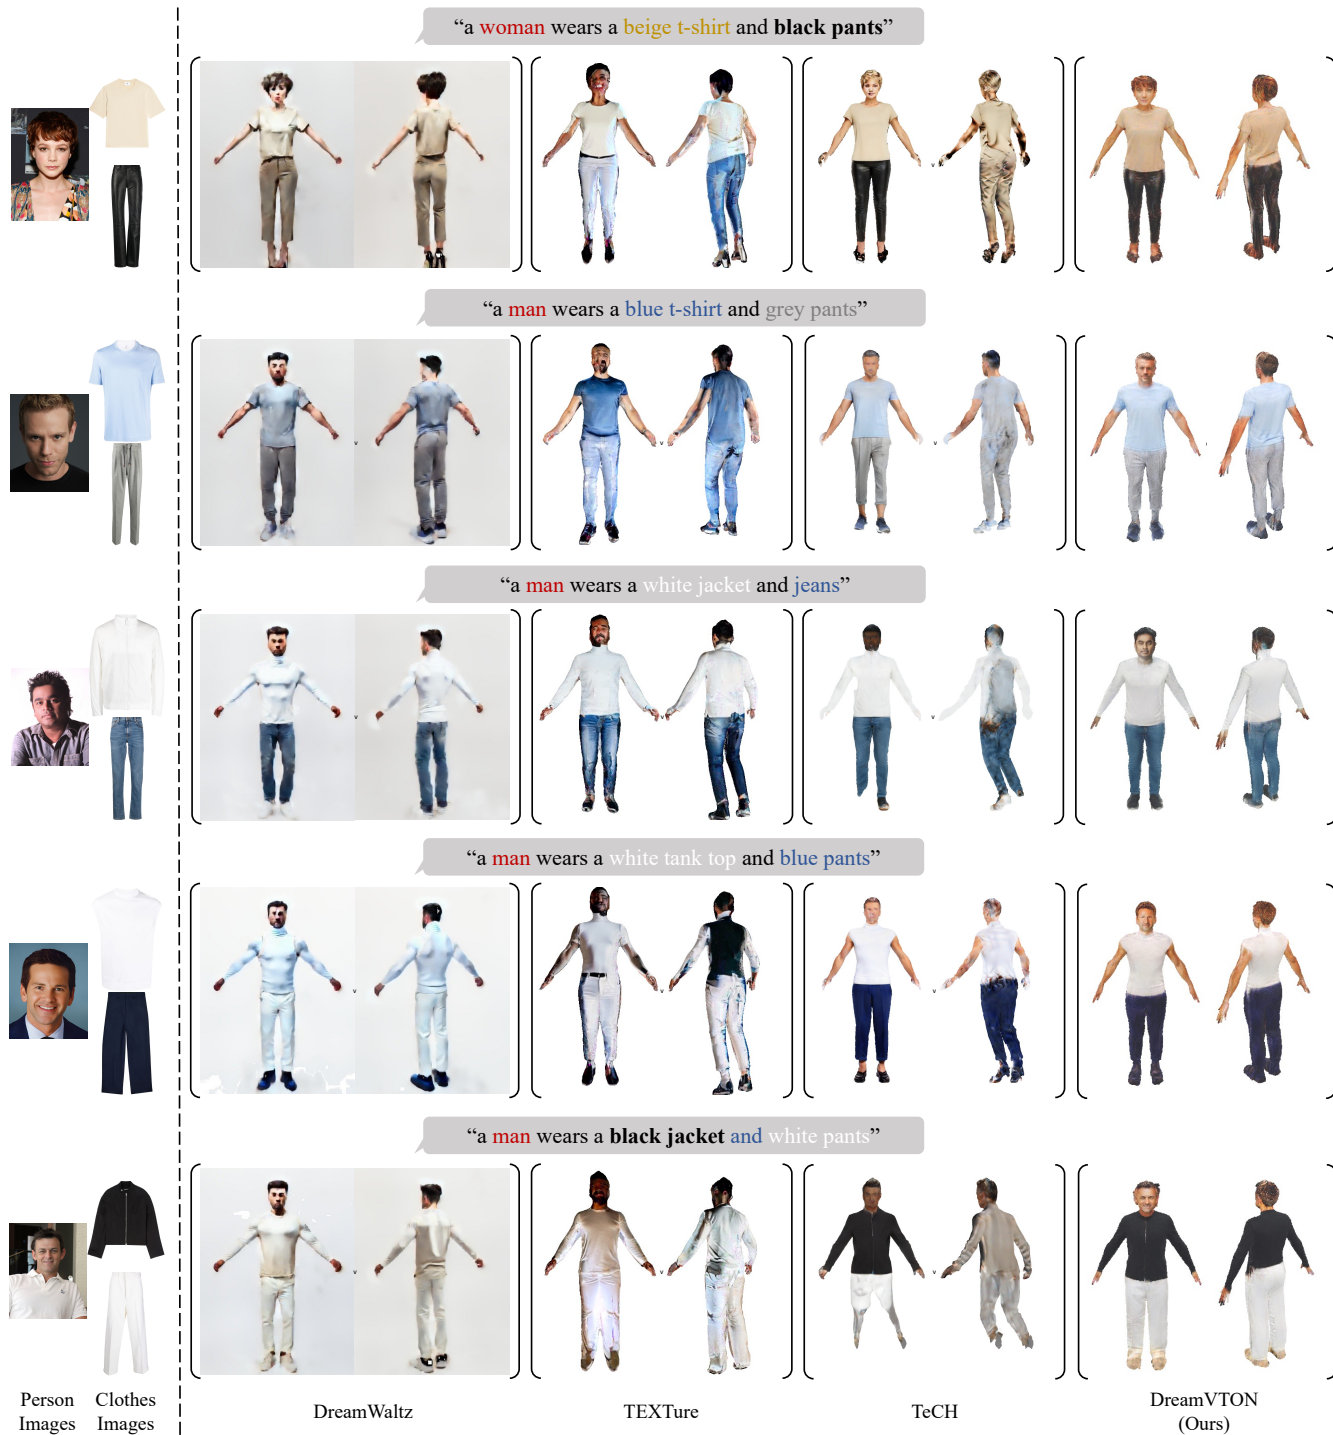

**Figure 3: Qualitative Comparisons.** Using the same clothes, person image, and prompt as inputs, our method achieves superior results.

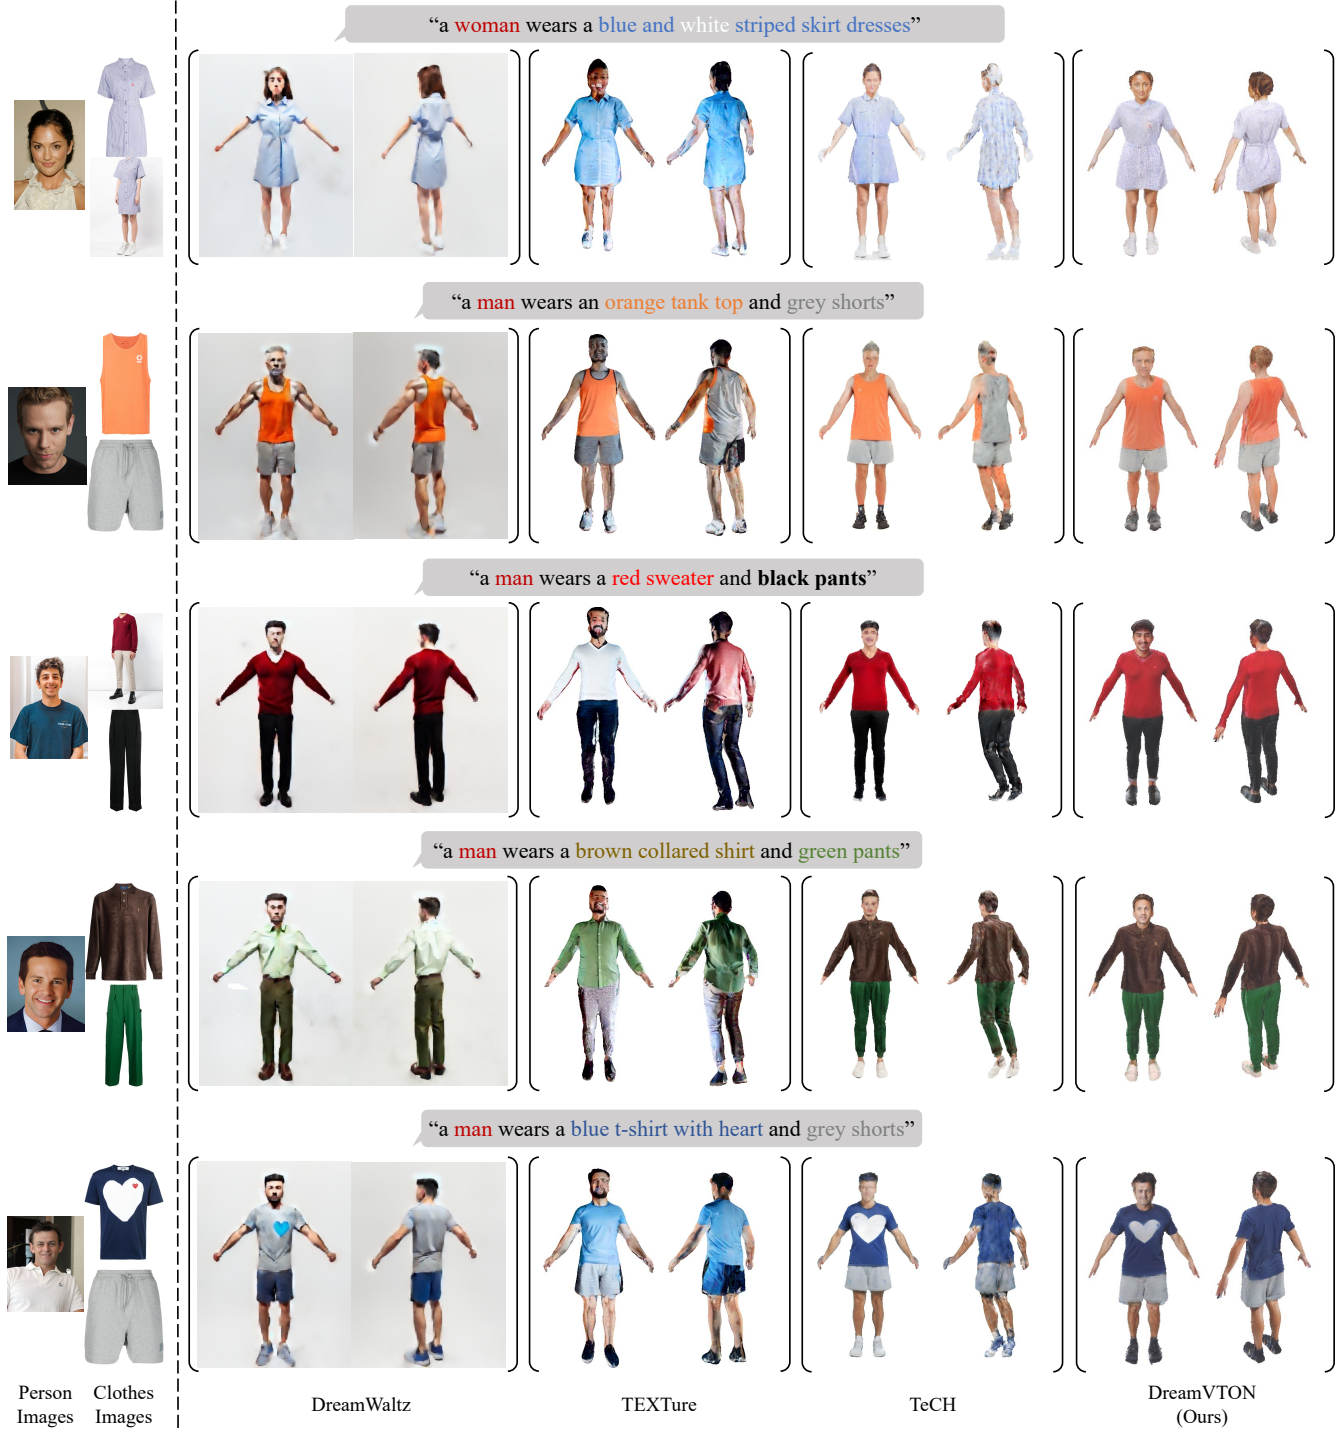

**Figure 4: Qualitative Comparisons.** Using the same clothes, person image, and prompt as inputs, our method achieves superior results.

REFERENCES

[1] Rui Chen, Yongwei Chen, Ningxin Jiao, and Kui Jia. 2023. Fantasia3d: Disentangling geometry and appearance for high-quality text-to-3d content creation. *arXiv preprint arXiv:2303.13873* (2023).

[2] Yukun Huang, Jianan Wang, Ailing Zeng, He Cao, Xianbiao Qi, Yukai Shi, Zheng-Jun Zha, and Lei Zhang. 2023. DreamWaltz: Make a Scene with Complex 3D Animatable Avatars. *arXiv preprint arXiv:2305.12529* (2023).

[3] Yangyi Huang, Hongwei Yi, Yuliang Xiu, Tingting Liao, Jiaxiang Tang, Deng Cai, and Justus Thies. 2024. TeCH: Text-guided Reconstruction of Lifelike Clothed Humans. In *International Conference on 3D Vision (3DV)*.

[4] Elad Richardson, Gal Metzer, Yuval Alaluf, Raja Giryes, and Daniel Cohen-Or. 2023. Texture: Text-guided texturing of 3d shapes. *arXiv preprint arXiv:2302.01721* (2023).

465  
466  
467  
468  
469  
470  
471  
472  
473  
474  
475  
476  
477  
478  
479  
480  
481  
482  
483  
484  
485  
486  
487  
488  
489  
490  
491  
492  
493  
494  
495  
496  
497  
498  
499  
500  
501  
502  
503  
504  
505  
506  
507  
508  
509  
510  
511  
512  
513  
514  
515  
516  
517  
518  
519  
520  
521  
522

523  
524  
525  
526  
527  
528  
529  
530  
531  
532  
533  
534  
535  
536  
537  
538  
539  
540  
541  
542  
543  
544  
545  
546  
547  
548  
549  
550  
551  
552  
553  
554  
555  
556  
557  
558  
559  
560  
561  
562  
563  
564  
565  
566  
567  
568  
569  
570  
571  
572  
573  
574  
575  
576  
577  
578  
579  
580
